# Supplementary material for: Automated Classification of Significant Prostate Cancer on MRI: A Systematic Review on the Performance of Machine Learning Applications
Source: PubMed Central journal article supplement (PMC7352160; doi:10.3390/cancers12061606), 2020-06-17
Supplement: cancers-12-01606-s001.pdf [file cancers-12-01606-s001.pdf]

*Supplementary materials*

# Automated Classification of Significant Prostate Cancer on MRI: A Systematic Review of the Performance of Machine Learning Applications

Jose M. Castillo T., Muhammad Arif, Wiro J. Niessen, Ivo G. Schoots and Jifke F. Veenland

## Supplementary Materials Section S1: Search strategy.

*The searches consisted of the following keywords combination:*

**Embase.com:** ('prostatic neoplasms'/exp OR (prosta\* AND (neoplas\* OR cancer\* OR tumour\* OR tumor\* OR carcinoma\*):ab,ti)) AND ('magnetic resonance imaging'/exp OR (MRI\* OR 'magnetic resonance' OR 'mr imaging'):ab,ti) AND (characteri\* OR agressiven\* OR differentiat\* OR accur\* or distinguish\* OR gradi\* OR classif\* OR stratif\* OR staging\* OR diagnos\* OR identi\* OR predict\* OR detect\* OR discrimin\* ):ab,ti AND ('machine learning'/exp OR (model\* OR (machine AND learning) OR CNN OR neural OR computer\* OR automat\* ) :ab,ti) NOT (conference abstract)/lim

**MEDLINE ovid:** ("Prostatic Neoplasms"/ OR (prostat\* AND (neoplas\* OR cancer\* OR tumour\* OR tumor\* OR carcinoma\* ) .ab,ti,kf.) AND ("Magnetic Resonance Imaging"/ OR (MRI\* OR "magnetic resonance" OR " mr imaging").ab,ti,kf.) AND ((characteri\* OR agressiven\* OR differentiat\* OR accur\* or distinguish\* OR gradi\* OR classif\* OR stratif\* OR staging\* OR diagnos\* OR identi\* OR predict\* OR detect\* OR discrimin\* ).ab,ti,kf.) AND ("machine learning"/ OR (model\* OR (machine AND learning) OR CNN OR neural OR computer\* OR automat\* ).ab,ti,kf.)

**Table S1.** Table with summary of extracted parameters regarding data sets from included papers.

| Firs Author Name  | Year | Type of Study | Population Description Present | Data Origin      | Number of Patients | Number of Lesions | Classification Problem                               | Ground Truth  | Positive Class Proportion | Gleason Distribution Described |
|-------------------|------|---------------|--------------------------------|------------------|--------------------|-------------------|------------------------------------------------------|---------------|---------------------------|--------------------------------|
| Abraham B. [5]    | 2018 | Retrospective | yes                            | Public           | 162                | 182               | ISUP 5 classes                                       | Biopsies      | 40                        | yes                            |
| Abraham B. [6]    | 2019 | Retrospective | yes                            | Public           | ??                 | 100               | ISUP 5 classes                                       | Biopsies      | 68                        | yes                            |
| Antonelli M. [17] | 2019 | Prospective   | yes                            | Local            | 164                | 164               | GS 4 vs GS 3                                         | Biopsies      | 63                        | yes                            |
| Chaddad A. [25]   | 2018 | Retrospective | yes                            | Public           | 99                 | 99                | GS 6 vs 7(3 + 4) vs $\geq 7$ (4 + 3)                 | Biopsies      | 69                        | yes                            |
| Chaddad A. [26]   | 2018 | Retrospective | yes                            | Public           | 99                 | 99                | $GS \leq 6$ / $7(3 + 4) / \geq 7(4 + 3)$             | Biopsies      | 69                        | yes                            |
| Chen Q. [27]      | 2019 | Retrospective | yes                            | Public           | 344                | 538               | $GS \geq 7$ vs $\leq 6$                              | Biopsies      | 23                        | yes                            |
| Chen T. [28]      | 2018 | Retrospective | yes                            | Local            | 182                | 184               | $GS \geq 7$ vs $\leq 6$                              | Biopsies      | 78                        | yes                            |
| Dikaios N. [30]   | 2015 | Retrospective | yes                            | Local            | 155                | 0                 | $GS \geq 7$ vs $\leq 6$                              | Biopsies      | 40                        | No                             |
| Dikaios N. [29]   | 2015 | Retrospective | yes                            | Local            | 231                | 0                 | $GS \geq 7$ vs $\leq 6$                              | Biopsies      | 38                        | yes                            |
| Dinh A.H. [31]    | 2018 | Prospective   | yes                            | Local            | 106                | 104               | $GS \geq 7$ vs $\leq 6$                              | Biopsies      | 42                        | yes                            |
| Dinh A.H. [7]     | 2016 | Prospective   | yes                            | Local            | 106                | 104               | $GS \geq 7$ vs $\leq 6$                              | Prostatectomy | 83                        | yes                            |
| Fehr D. [8]       | 2015 | Retrospective | yes                            | Local            | 147                | 193               | $GS \geq 7$ vs $\leq 6$                              | Prostatectomy | 82                        | yes                            |
| Jensen C. [9]     | 2019 | Retrospective | yes                            | Public           | 99                 | 112               | ISUP 5 classes                                       | Biopsies      | 68                        | yes                            |
| Kwon D. [10]      | 2018 | Retrospective | yes                            | Public           | 204                | 330               | $GS \geq 7$ vs $\leq 6$                              | Biopsies      | 70                        | No                             |
| Li J. [11]        | 2018 | Retrospective | yes                            | Local            | 48                 | 152               | $GS \geq 7$ vs $\leq 6$                              | Biopsies      | 83                        | yes                            |
| Li Q. [12]        | 2019 | Retrospective | yes                            | Local            | 103                | 167               | $GS \geq 7$ vs $\leq 6$                              | Biopsies      | 27                        | yes                            |
| Maas M.C. [13]    | 2019 | Prospective   | yes                            | Local            | 50                 | 65                | $GS \geq 7$ vs $\leq 6$                              | Prostatectomy | 57                        | yes                            |
| Mehrtash A. [14]  | 2017 | Retrospective | yes                            | Public           | 341                | 529               | $GS \geq 7$ vs $\leq 6$                              | Biopsies      | 23                        | yes                            |
| Peng Y. [15]      | 2013 | Retrospective | yes                            | Local            | 48                 | 61                | Low Grade (3 + 4) and normal tissue vs cancer tissue | Prostatectomy | 77                        | yes                            |
| Penzias G. [16]   | 2018 | Retrospective | yes                            | Local + External | 36                 | 105               | $GS \geq 7$ vs $\leq 6$                              | Prostatectomy | 55                        | yes                            |
| Rozenberg R. [18] | 2016 | Retrospective | yes                            | Local            | 54                 | 54                | GS 3 + 4 vs 4 + 3                                    | Prostatectomy | 26                        | No                             |
| Schelb [19]       | 2019 | Retrospective | yes                            | Local            | 312                | 457               | $GS \geq 7$ vs $\leq 6$                              | Biopsies      | 38                        | yes                            |
| Toivonen J. [20]  | 2019 | Prospective   | yes                            | Local            | 62                 | 100               | GS 3 + 3 vs >6                                       | Biopsies      | 80                        | yes                            |
| Transin S. [21]   | 2019 | Retrospective | yes                            | Local            | 74                 | 127               | $GS \geq 7$ vs $\leq 6$                              | Prostatectomy | 70                        | yes                            |
| Min X. [22]       | 2019 | Retrospective | No                             | Local            | 280                | 280               | $GS \geq 7$ vs $\leq 6$                              | Biopsies      | 86                        | yes                            |
| Zhong X. [23]     | 2019 | Retrospective | yes                            | Local            | 140                | 216               | $GS \geq 7$ vs $\leq 6$                              | Prostatectomy | 49                        | yes                            |
| Zhu L. [24]       | 2019 | Retrospective | yes                            | Local            | 153                | 116               | $GS \geq 7$ vs $\leq 6$                              | Biopsies      | 64                        | yes                            |

GS: Gleason score.

**Table S2.** Table with summary of extracted parameters regarding MRI data from included papers.

| First Author Name | Year | Protocol Present | Vendor 1 | Scanner        | M. F (T) | Vendor 2 | Scanner 2 | M. F (T) | T2  | ADC | DWI | DCE |
|-------------------|------|------------------|----------|----------------|----------|----------|-----------|----------|-----|-----|-----|-----|
| Abraham B. [5]    | 2018 | No               | Siemens  | Magnetom       | 3        | Siemens  | Skyra     | 3        | Yes | Yes | Yes | No  |
| Abraham B. [6]    | 2019 | No               | Siemens  | Trio-trim      | 3        | -        | -         | -        | Yes | Yes | Yes | No  |
| Antonelli M. [17] | 2019 | Yes              | Philips  | Achieva        | 3        | -        | -         | -        | Yes | Yes | No  | Yes |
| Chaddad A. [25]   | 2018 | No               | Siemens  | Magnetom       | 3        | Siemens  | Skyra     | 3        | Yes | Yes | No  | No  |
| Chaddad A. [26]   | 2018 | Yes              | Siemens  | Magnetom       | 3        | -        | -         | -        | Yes | Yes | No  | No  |
| Chen Q. [27]      | 2019 | Yes              | Siemens  | Magnetom Trio  | 3        | Siemens  | Skyra     | 3        | Yes | Yes | No  | Yes |
| Chen T. [28]      | 2018 | Yes              | Philips  | Intera Achieva | 3        | -        | -         | -        | Yes | Yes | Yes | No  |
| Dikaios N. [30]   | 2015 | Yes              | Siemens  | Avanto         | 1.5      | -        | -         | -        | Yes | Yes | No  | Yes |
| Dikaios N. [29]   | 2015 | Yes              | -        | -              | 1.5      | -        | -         | -        | Yes | Yes | No  | No  |
| Dinh A.H. [31]    | 2018 | Yes              | GE       | -              | 3        | Philips  | Achieva   | 3        | No  | Yes | No  | No  |
| Dinh A.H. [7]     | 2016 | No               | -        | -              | -        | -        | -         | -        | Yes | Yes | No  | Yes |
| Fehr D. [8]       | 2015 | Yes              | GE       | Signa HDX      | 3        | -        | -         | -        | Yes | Yes | No  | No  |
| Jensen C. [9]     | 2019 | Yes              | Siemens  | Trio-trim      | 3        | Siemens  | Skyra     | 3        | Yes | Yes | Yes | Yes |
| Kwon D. [10]      | 2018 | Yes              | Siemens  | Trio-trim      | 3        | Siemens  | -         | 3        | Yes | Yes | Yes | Yes |
| Li J. [11]        | 2018 | Yes              | Philips  | Achieva        | 3        | -        | -         | -        | No  | Yes | No  | Yes |
| Li Q. [12]        | 2019 | No               | Siemens  | -              | 1.5      | -        | -         | -        | Yes | Yes | No  | Yes |
| Maas M.C. [13]    | 2019 | Yes              | Siemens  | Magnetom Skyra | 3        | -        | -         | -        | Yes | Yes | Yes | Yes |
| Mehrtash A. [14]  | 2017 | Yes              | Siemens  | Trio-trim      | 3        | -        | -         | -        | No  | Yes | Yes | Yes |
| Peng Y. [15]      | 2013 | Yes              | Philips  | Achieva        | 3        | -        | -         | -        | Yes | Yes | No  | No  |
| Penzias G. [16]   | 2018 | Yes              | Siemens  | Verio          | 3        | Philips  | -         | 3        | Yes | No  | No  | No  |
| Rozenberg R. [18] | 2016 | Yes              | Siemens  | Magnetom       | 3        | -        | -         | -        | No  | Yes | No  | No  |
| Schelb [19]       | 2019 | Yes              | Siemens  | Prisma         | 3        | -        | -         | -        | Yes | No  | Yes | No  |
| Toivonen J. [20]  | 2019 | Yes              | Philips  | Ingenuity      | 3        | -        | -         | -        | Yes | Yes | No  | Yes |
| Transin S. [21]   | 2019 | Yes              | Siemens  | Trio-trim      | 3        | -        | -         | -        | No  | Yes | No  | Yes |
| Min X. [22]       | 2019 | Yes              | Siemens  | -              | 3        | -        | -         | -        | Yes | Yes | Yes | No  |
| Zhong X. [23]     | 2019 | Yes              | Siemens  | Trio-trim      | 3        | -        | -         | -        | Yes | Yes | No  | No  |
| Zhu L. [24]       | 2019 | Yes              | Philips  | Achieva        | 3        | -        | -         | -        | Yes | Yes | Yes | No  |

M.F: Magnetic field in Tesla.

**Table S3.** Table with summary of extracted parameters regarding model's performance and methodology from included papers.

| Firs Author Name  | Year | Method                        | Balancing of Data | Data Augmentation | AUC   | Sensitivity | Specificity | External Validation | Validation Radiologist using CAD |
|-------------------|------|-------------------------------|-------------------|-------------------|-------|-------------|-------------|---------------------|----------------------------------|
| Abraham B. [5]    | 2018 | Neural Network                | No                | No                | 0.72  | 0.8         | 0.55        | No                  | No                               |
| Abraham B. [6]    | 2019 | CNN+ ordinal class classifier | Yes               | No                | 0.78  | 0.91        | 0.5         | No                  | No                               |
| Antonelli M. [17] | 2019 | Logistic regression           | Yes               | Yes               | 0.79  | 0.85        | 0.5         | No                  | No                               |
| Chaddad A. [25]   | 2018 | Random Forest                 | Yes               | No                | 0.83  | -           | -           | No                  | No                               |
| Chaddad A. [26]   | 2018 | Random Forest                 | Yes               | No                | 0.78  | -           | -           | No                  | No                               |
| Chen Q. [27]      | 2019 | CNN                           | Yes               | Yes               | 0.83  | -           | -           | No                  | No                               |
| Chen T. [28]      | 2018 | Logistic regression           | Yes               | Yes               | 0.77  | 0.83        | 0.67        | No                  | No                               |
| Dikaïos N. [30]   | 2015 | Logistic regression           | No                | No                | 0.67  | -           | -           | No                  | No                               |
| Dikaïos N. [29]   | 2015 | Logistic regression           | No                | No                | 0.79  | -           | -           | No                  | No                               |
| Dinh A.H. [31]    | 2018 | Linear mix model              | No                | No                | 0.95  | -           | -           | Yes                 | No                               |
| Dinh A.H. [7]     | 2016 | Linear mix model              | No                | No                | 0.89  | 0.79        | 0.84        | No                  | No                               |
| Fehr D. [8]       | 2015 | SVM                           | Yes               | Yes               | 0.93  | 0           | 0           | No                  | No                               |
| Jensen C. [9]     | 2019 | k-nearest neighbor            | No                | No                | 0.87  | 0.8         | 0.91        | No                  | No                               |
| Kwon D. [10]      | 2018 | Random Forest                 | No                | No                | 0.82  | 0.8         | 0.76        | No                  | No                               |
| Li J. [11]        | 2018 | SVM                           | Yes               | Yes               | 0.91  | 0.82        | 0.87        | No                  | No                               |
| Li Q. [12]        | 2019 | Linear discriminant analysis  | No                | No                | 0.70  | 0.79        | 0.82        | No                  | No                               |
| Maas M.C. [13]    | 2019 | Logistic regression           | No                | No                | 0.78  | -           | -           | No                  | No                               |
| Mehrtash A. [14]  | 2017 | CNN                           | Yes               | Yes               | 0.8   | -           | -           | No                  | No                               |
| Peng Y. [15]      | 2013 | Linear discriminant analysis  | No                | No                | 0.78  | -           | -           | No                  | No                               |
| Penzias G. [16]   | 2018 | Random Forest                 | No                | No                | 0.66  | -           | -           | Yes                 | No                               |
| Rozenberg R. [18] | 2016 | SVM                           | No                | No                | 0.77  | 0.71        | 0.78        | No                  | No                               |
| Schelb [19]       | 2019 | CNN                           | No                | No                | -     | 0.92        | 0.47        | No                  | No                               |
| Toivonen J. [20]  | 2019 | CNN                           | No                | No                | 0.88  | -           | -           | No                  | No                               |
| Transin S. [21]   | 2019 | Linear mix model              | No                | No                | 0.78  | 0.85        | 0.42        | Yes                 | No                               |
| Min X. [22]       | 2019 | Logistic regression           | Yes               | Yes               | 0.82  | 0.84        | 0.72        | No                  | No                               |
| Zhong X. [23]     | 2019 | CNN                           | Yes               | Yes               | 0.726 | 0.636       | 0.8         | No                  | No                               |
| Zhu L. [24]       | 2019 | Neural Network + radiologist  | No                | No                | 0.89  | 0.93        | 0.66        | No                  | Yes                              |

(-) Missing values in the manuscripts. CAD: computer aided diagnostic system.

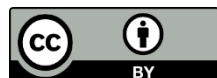

© 2020 by the authors. Licensee MDPI, Basel, Switzerland. This article is an open access article distributed under the terms and conditions of the Creative Commons Attribution (CC BY) license (<http://creativecommons.org/licenses/by/4.0/>).
